# Supplementary material for: A High-Throughput NanoBiT-Based Serological Assay Detects SARS-CoV-2 Seroconversion
Source: PubMed Central journal article supplement (PMC8004173; doi:10.3390/nano11030807), 2021-03-22
Supplement: nanomaterials-11-00807-s001.pdf [file nanomaterials-11-00807-s001.pdf]

## Supplementary Materials

# A High-Throughput NanoBiT-Based Serological Assay Detects SARS-CoV-2 Seroconversion

Taha Azad <sup>1,2,†</sup>, Reza Rezaei <sup>1,2,†</sup>, Ragnath Singaravelu <sup>1,2,†</sup>, Taylor R. Jamieson <sup>1,2</sup>, Mathieu J. F. Crupi <sup>1,2</sup>, Abera Surendran <sup>1,2</sup>, Joanna Poutou <sup>1,2</sup>, Parisa Taklifi <sup>3</sup>, Juthaporn Cowan <sup>4</sup>, D. William Cameron <sup>4</sup> and Carolina S. Ilkow <sup>1,2,\*</sup>

<sup>1</sup> Ottawa Hospital Research Institute, Ottawa, ON K1H 8L6, Canada

<sup>2</sup> Department of Biochemistry, Microbiology and Immunology, University of Ottawa, Ottawa, ON K1H 8M5, Canada

<sup>3</sup> Department of Biotechnology, University of Tehran, Tehran, Iran

<sup>4</sup> Department of Medicine, Division of Infectious Disease, University of Ottawa at The Ottawa Hospital/Research Institute, Ottawa, ON, Canada

\* Correspondence: cilkow@ohri.ca; Tel.: +1-613-737-8899 (ext. 75208)

† These authors contributed equally

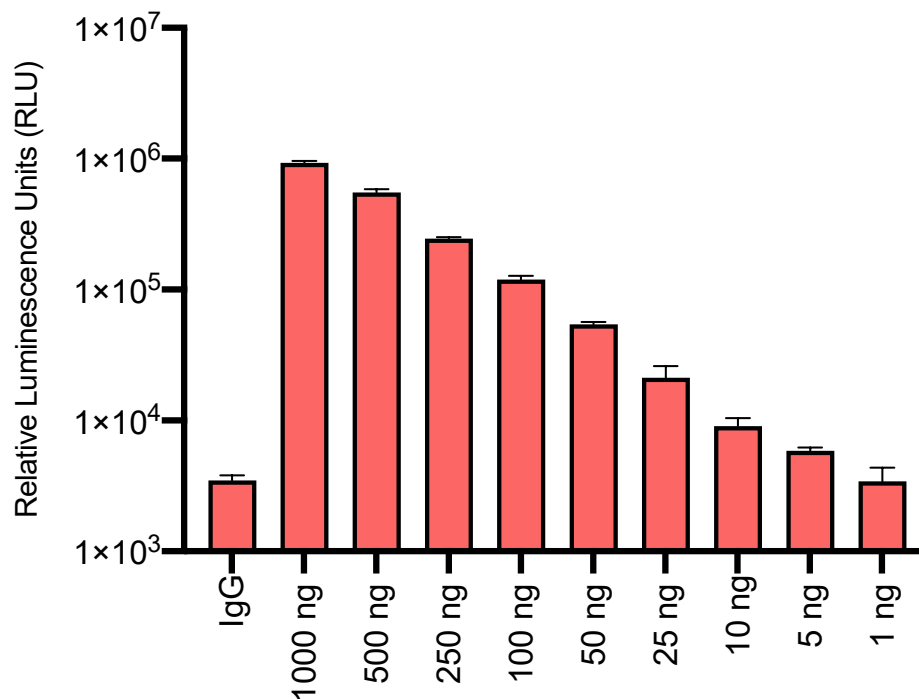

**Figure S1.** High signal intensity and detection of different amount of the SARS-CoV-2 neutralizing antibodies compared to low signal for the control antibody.
